# Supplementary material for: Colloidal and Biological Characterization of Dual Drug-Loaded Smart Micellar Systems
Source: MDPI journal article supplement (doi:10.3390/polym16091189), 2024-04-24
Supplement: s1 [file s1]

## Supporting Information

# Colloidal and biological characterization of dual drug-loaded smart micellar systems

Hildegard Herman<sup>1</sup>, Delia. M. Rata<sup>2</sup>, Anca N. Cadinoiu<sup>2</sup>, Leonard I. Atanase<sup>2,3,\*</sup>, Anca Hermenean<sup>1</sup>

<sup>1</sup> “Aurel Ardelean” Institute of Life Sciences, Vasile Goldis Western University, Rebreanu Street, No. 86, 310414 Arad, Romania; H.H - hildegard.i.herman@gmail.com; A.H. - anca.hermenean@gmail.com

<sup>2</sup> Faculty of Medicine, “Apollonia” University of Iasi, Pacurari Street, No. 11, 700511 Iasi, Romania; D.M.R. - iureadeliamihaela@yahoo.com; A.N.C. - jancaniculina@yahoo.com; L.I.A. – leonard.atanase@yahoo.com

<sup>3</sup> Academy of Romanian Scientists, 050045 Bucharest, Romania

Table S1: Colloidal data of drug-loaded PMs at a concentration of 0.1 wt% and 37°C obtained in PBS (pH = 7.4).

| Sample |          | Copolymer/Drug Ratio (mg/mg) | Z-average (nm) | Dv (nm)             | PDI   |
|--------|----------|------------------------------|----------------|---------------------|-------|
| JPL 12 | Free PMs | -                            | 41.6           | 34.3                | 0.251 |
|        | PTX      | 20                           | 44.5           | 38.0                | 0.199 |
|        |          | 10                           | 51.3           | 44.2                | 0.132 |
|        |          | 5                            | 68.6           | 58.6                | 0.108 |
|        |          | 2                            | n.d            |                     | n.d   |
|        | UA       | 10                           | 353.7          | 507.8               | 0.256 |
|        | PTX+ UA  | 10                           | 226.4          | 648-33%<br>44.5-67% | 0.667 |
|        |          | 5                            | 319.4          | 643-65%<br>55.7-35% | 0.415 |
|        |          | 2                            | 618.6          | 1102-96%<br>111-4%  | 0.360 |
| JPL7   | Free PMs | -                            | 140.4          | 141.5               | 0.041 |
|        | PTX      | 10                           | 1851           | 1202-95%<br>131-5%  | 0.786 |
|        | UA       |                              | 312.4          | n.d                 | 0.435 |

|            |      |                        |       |
|------------|------|------------------------|-------|
| PTX+<br>UA | 1648 | 1458-<br>95%<br>290-5% | 0.732 |
|------------|------|------------------------|-------|
